# Supplementary material
Source: PubMed Central journal article supplement (PMC4125725)

# Run Quality Report

## Metadata

|            |                               |
|------------|-------------------------------|
| Filename   | 20100219_SvNa_SA_Ecoli_picked |
| Instrument | LTQ Orbitrap XL               |
| Date       | 2010-02-22                    |

## Overview Plots

TIC

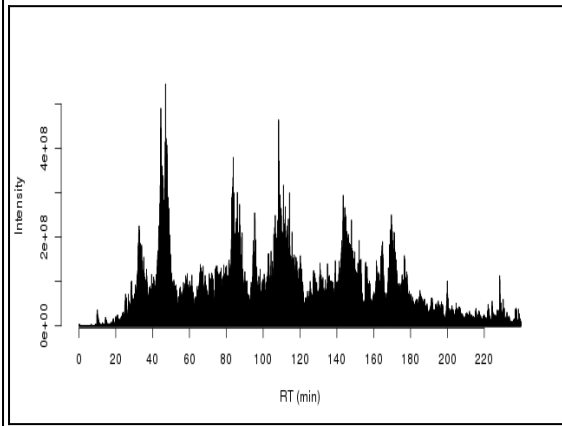

Map overview

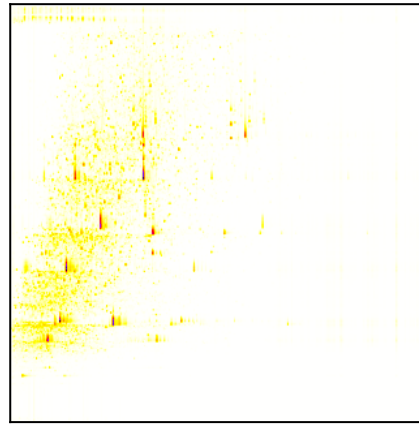

Mass accuracy

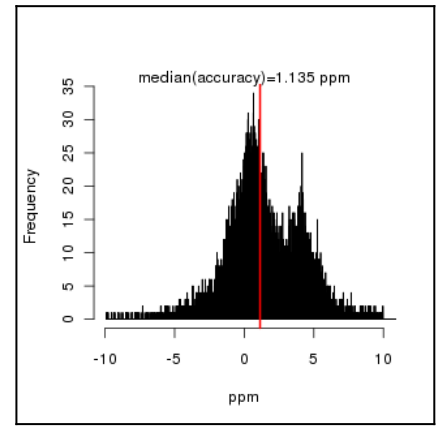

## Details

### Acquisition details

| Name              | Value |
|-------------------|-------|
| MS1 spectra count | 4536  |
| MS2 spectra count | 30358 |

### Acquisition ranges

|                 | Minimum | Maximum    |
|-----------------|---------|------------|
| <i>RT [s]</i>   | 0.1764  | 14399.9268 |
| <i>MZ [amu]</i> | 300     | 1532       |

### Identification details

| Name                                         | Value |
|----------------------------------------------|-------|
| total number of missed cleavages             | 1012  |
| total number of identified proteins          | 1196  |
| total number of uniquely identified proteins | 1196  |
| total number of PSMs                         | 10223 |
| total number of identified peptides          | 10223 |
| total number of uniquely identified peptides | 5690  |

### Database

/tmp/GKN-STASH/GKN-STASH-EMT2XnzNASwCg4fv/ecoli\_0-1827348287.fasta

### Feature Finding

| Name               | Value |
|--------------------|-------|
| number of features | 20181 |

Fractional masses report

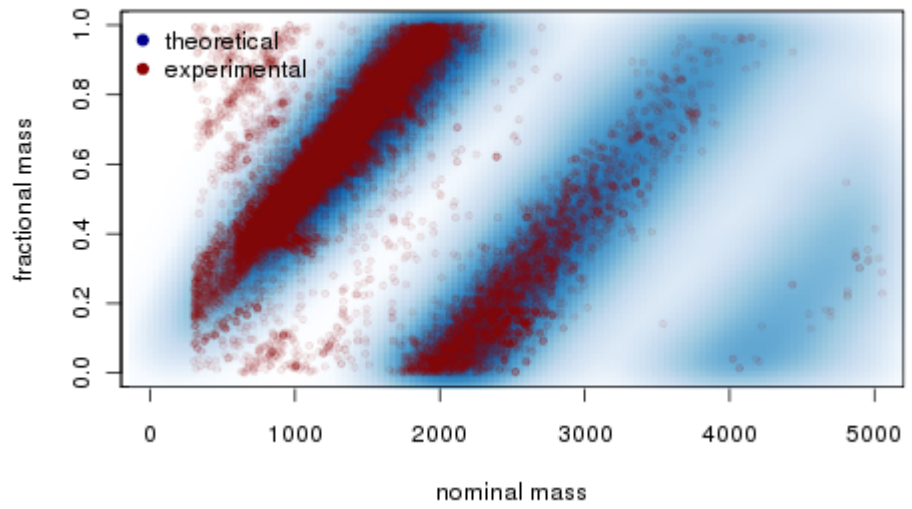

ID ratio report

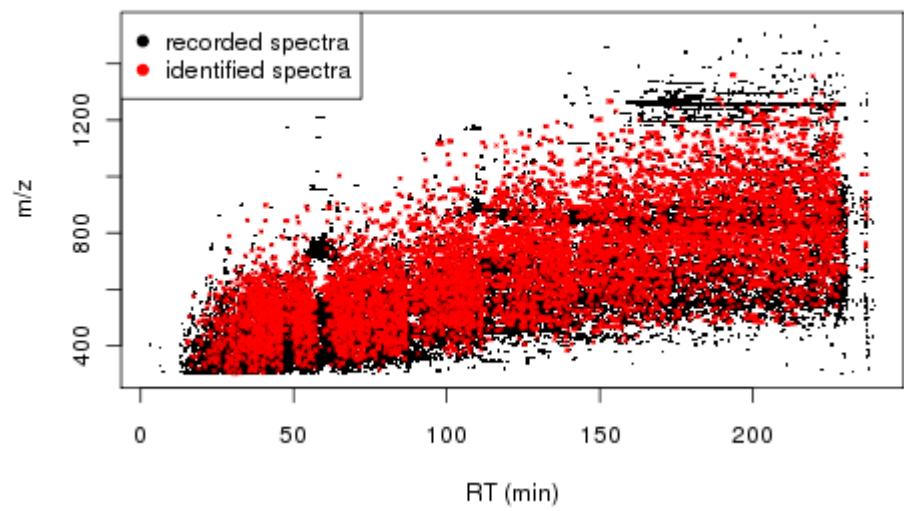

Mass accuracy over RT

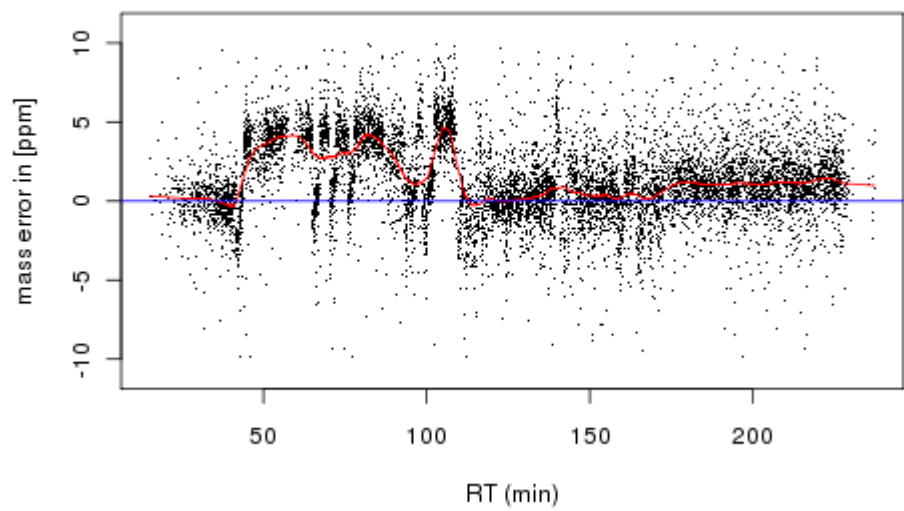

Feature charge distribution

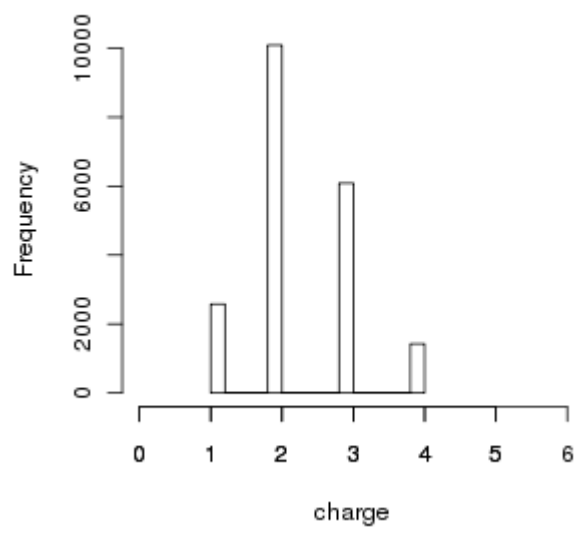

ID numbers

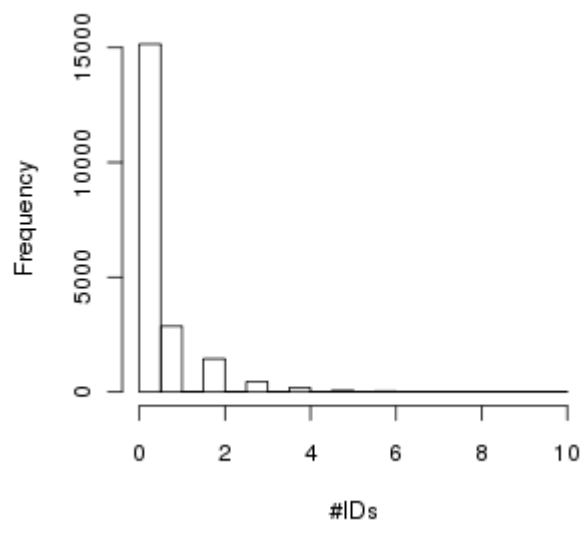

FWHM vs. # of IDs

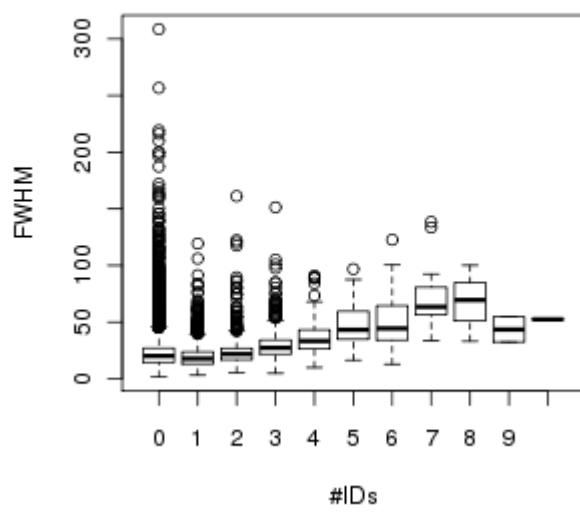

Supplement: supp_M113.035907_mcp.M113.035907-6.pdf [file supp_M113.035907_mcp.M113.035907-6.pdf]
