# Supplementary material
Source: PubMed Central journal article supplement (PMC4125725)

This is the detailed qcML workflow example. It will create a qcML file like the simple example, but use more features to generate a nice report for print or archiving.

The preprocessing node is performing feature detection and identification, each resulting in a file we can use to have a look at the quality. Make sure the input node has the mzML file from the example folder registered, and the database input node inside the preprocessing metanode has the supplied ecoli fasta file registered.

The QC Calculator will take the three files to calculate basic statistics and agglomerate quality data we need later to apply more advanced quality metrics. All will be stored in a qcML file, which will make it easy to access the data we need. We will add more data and hand the extended file over to the next step.

The ID Ratio metanode will create a plot of the measured spectra vs. the identified spectra in vs. RT map. The plot will be included in the qcML file and in addition sent to the reporting tool.

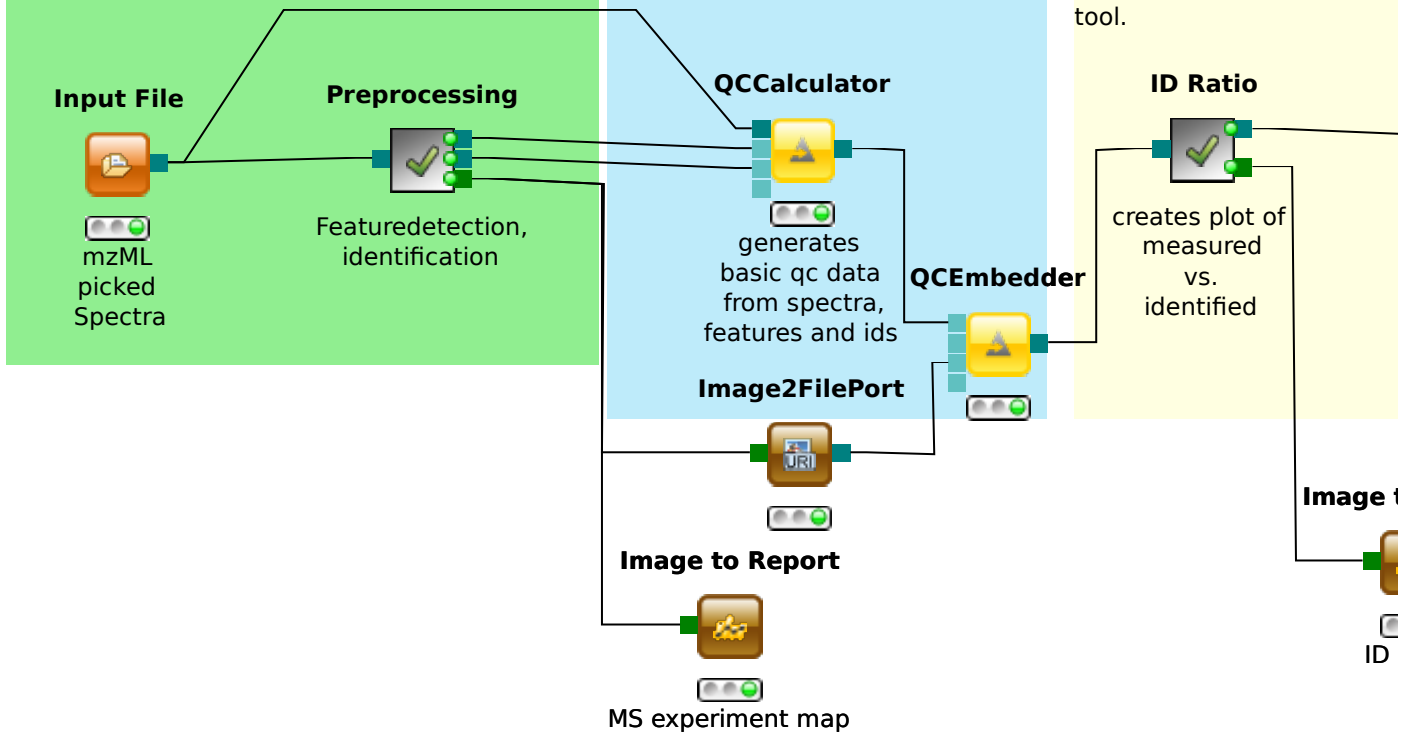

If we have additional data available in tabular format, we can add these as well. In this case we can add the injection times of the machine to the qcML file.

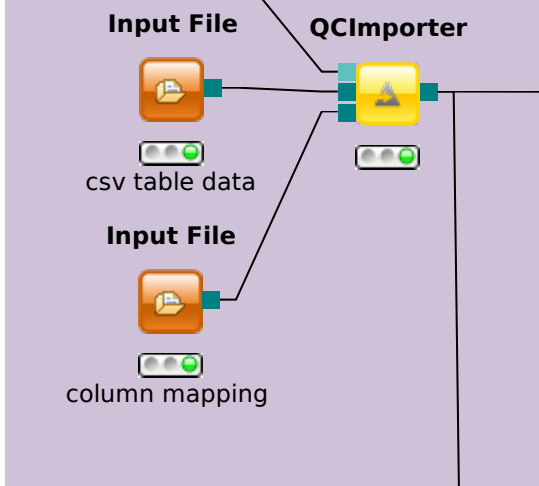

Pushing data into a qcML file is nice, but accessing the data is almost as easy. This metanode will do it by XPATH query. The accessed values will be made available to the reporting tool.

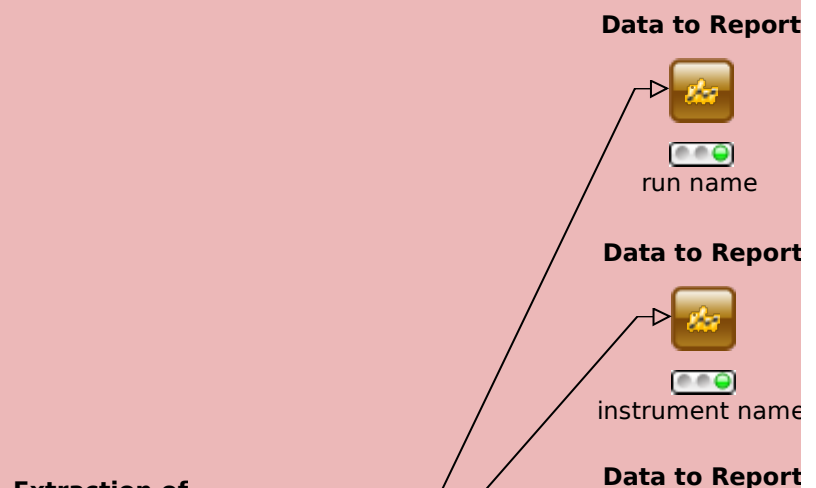

In the Mass Accuracy metanode, the accuracy of the measurement will be analysed by reference to the identifications. The calculated median deviation and the corresponding plot will add to the qcML file. We will also plot the mass accuracy over the elution time.

In the following Fractional Mass metanode we will use a external reference file of theoretical masses to plot the experimentally aquired fractional masses on the theoretical possible. Make sure, the inputnode in the Theoretical Masses metanode has the supplied theoretical\_masses.txt file registered.

The last metanode is plotting the total ion current of the experiment.

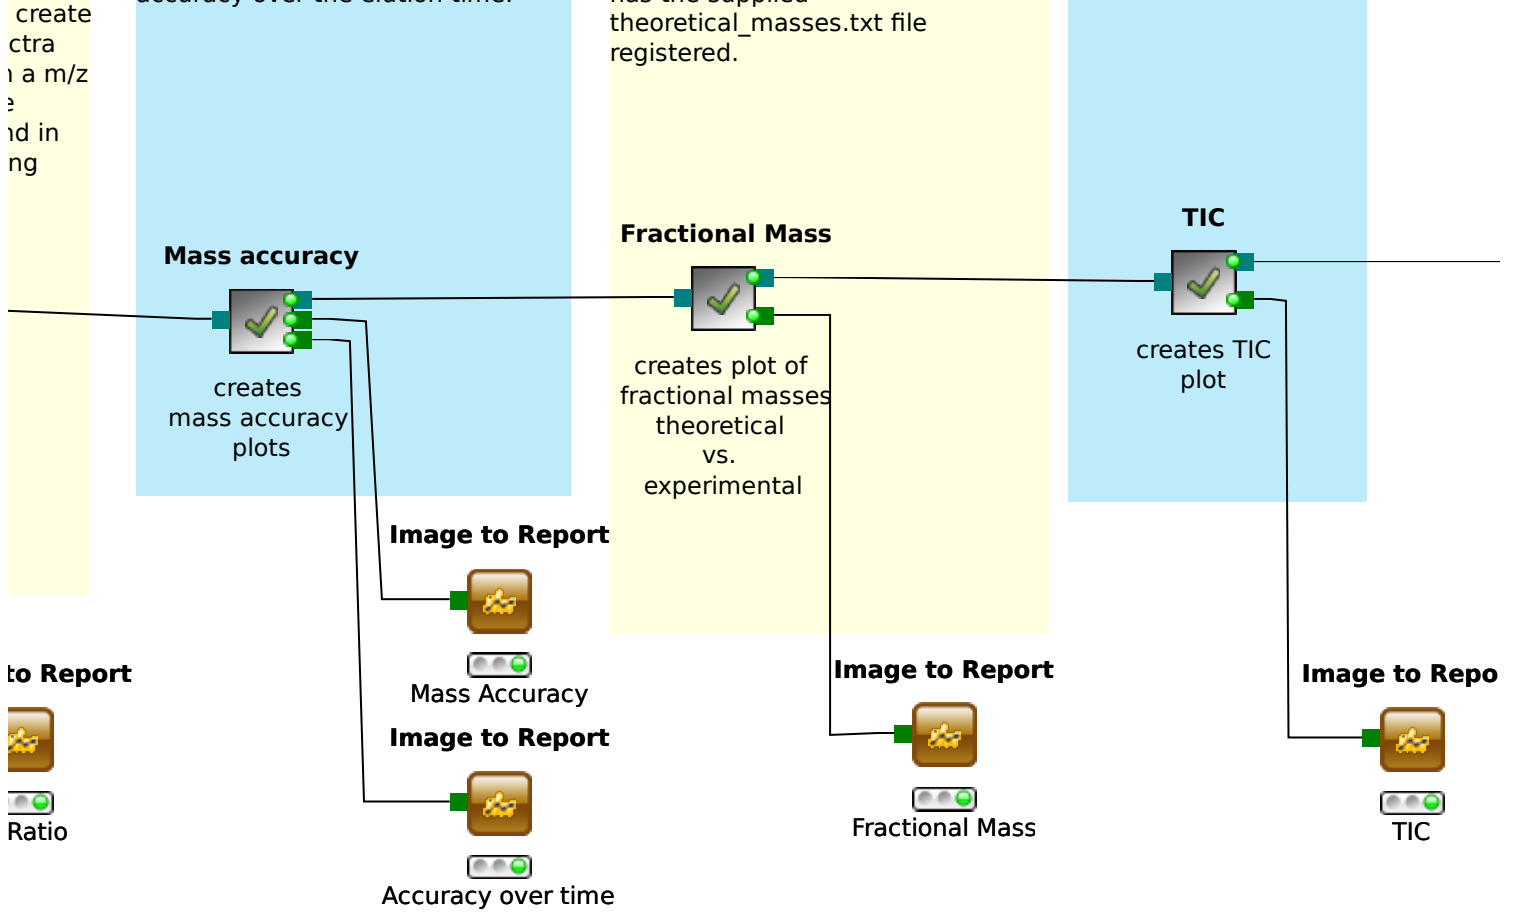

When the workflow has complete execution, you can click the open button in the top button pane to create a nice pdf.

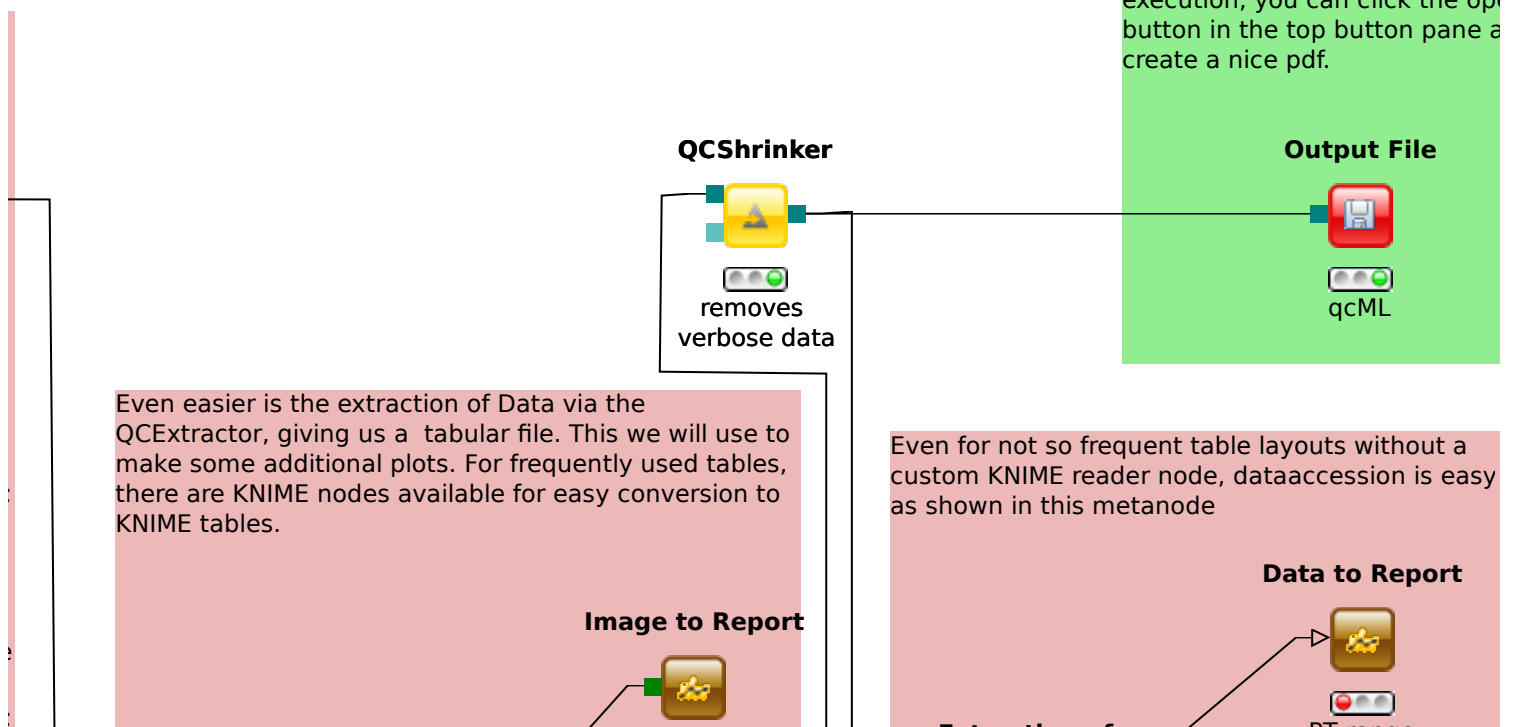

rt

ted  
en report  
nd

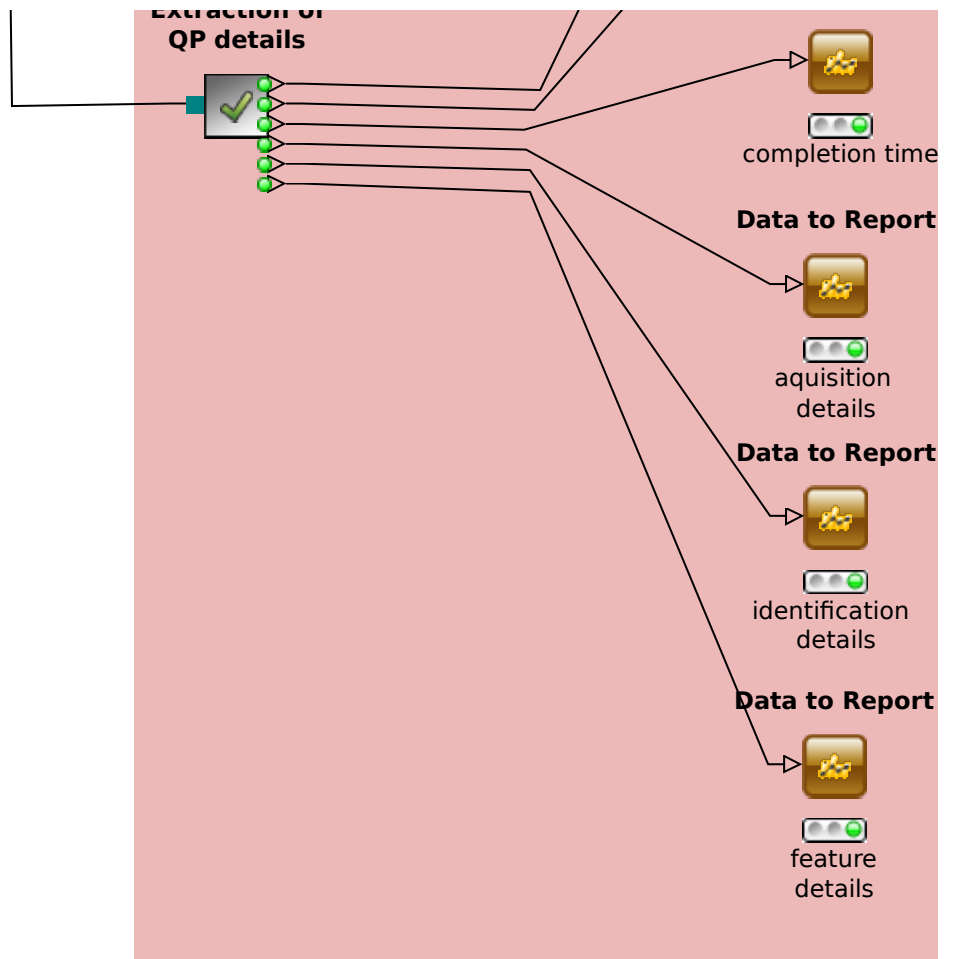

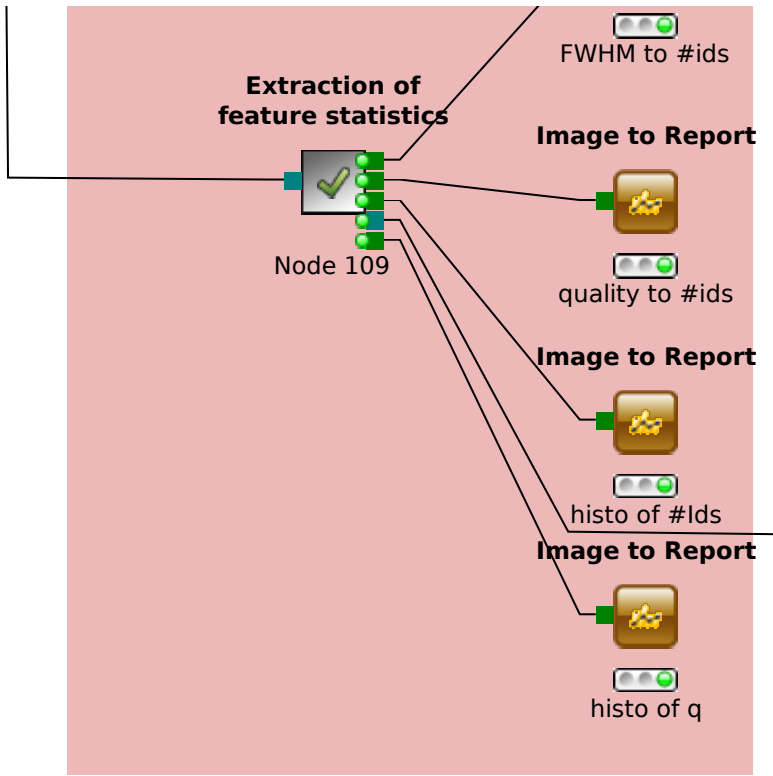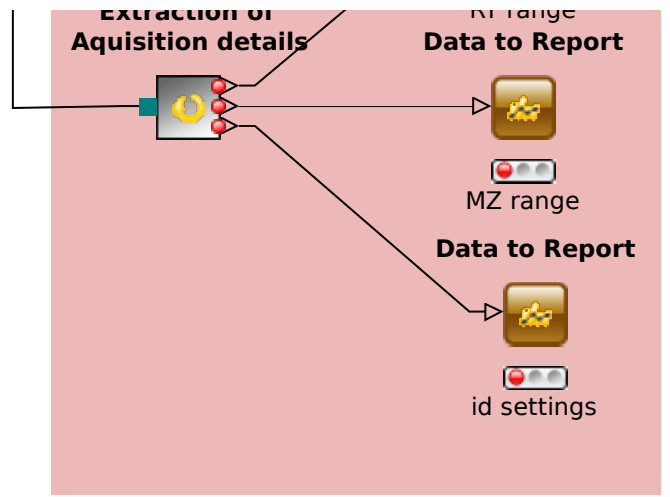

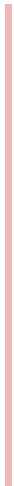

Supplement: supp_M113.035907_mcp.M113.035907-11.pdf [file supp_M113.035907_mcp.M113.035907-11.pdf]
