# Supplementary material
Source: PubMed Central journal article supplement (PMC4125725)
Supplement: supp_M113.035907_mcp.M113.035907-5.pdf [file supp_M113.035907_mcp.M113.035907-5.pdf]

## Run Quality Report

### Metadata

Filename 20100219\_SvNa\_SA\_Ecoli\_picked20100219\_SvNa\_SA\_Ecoli\_picked  
 Instrument LTQ Orbitrap XL  
 Date 2010-02-22

### Overview Plots

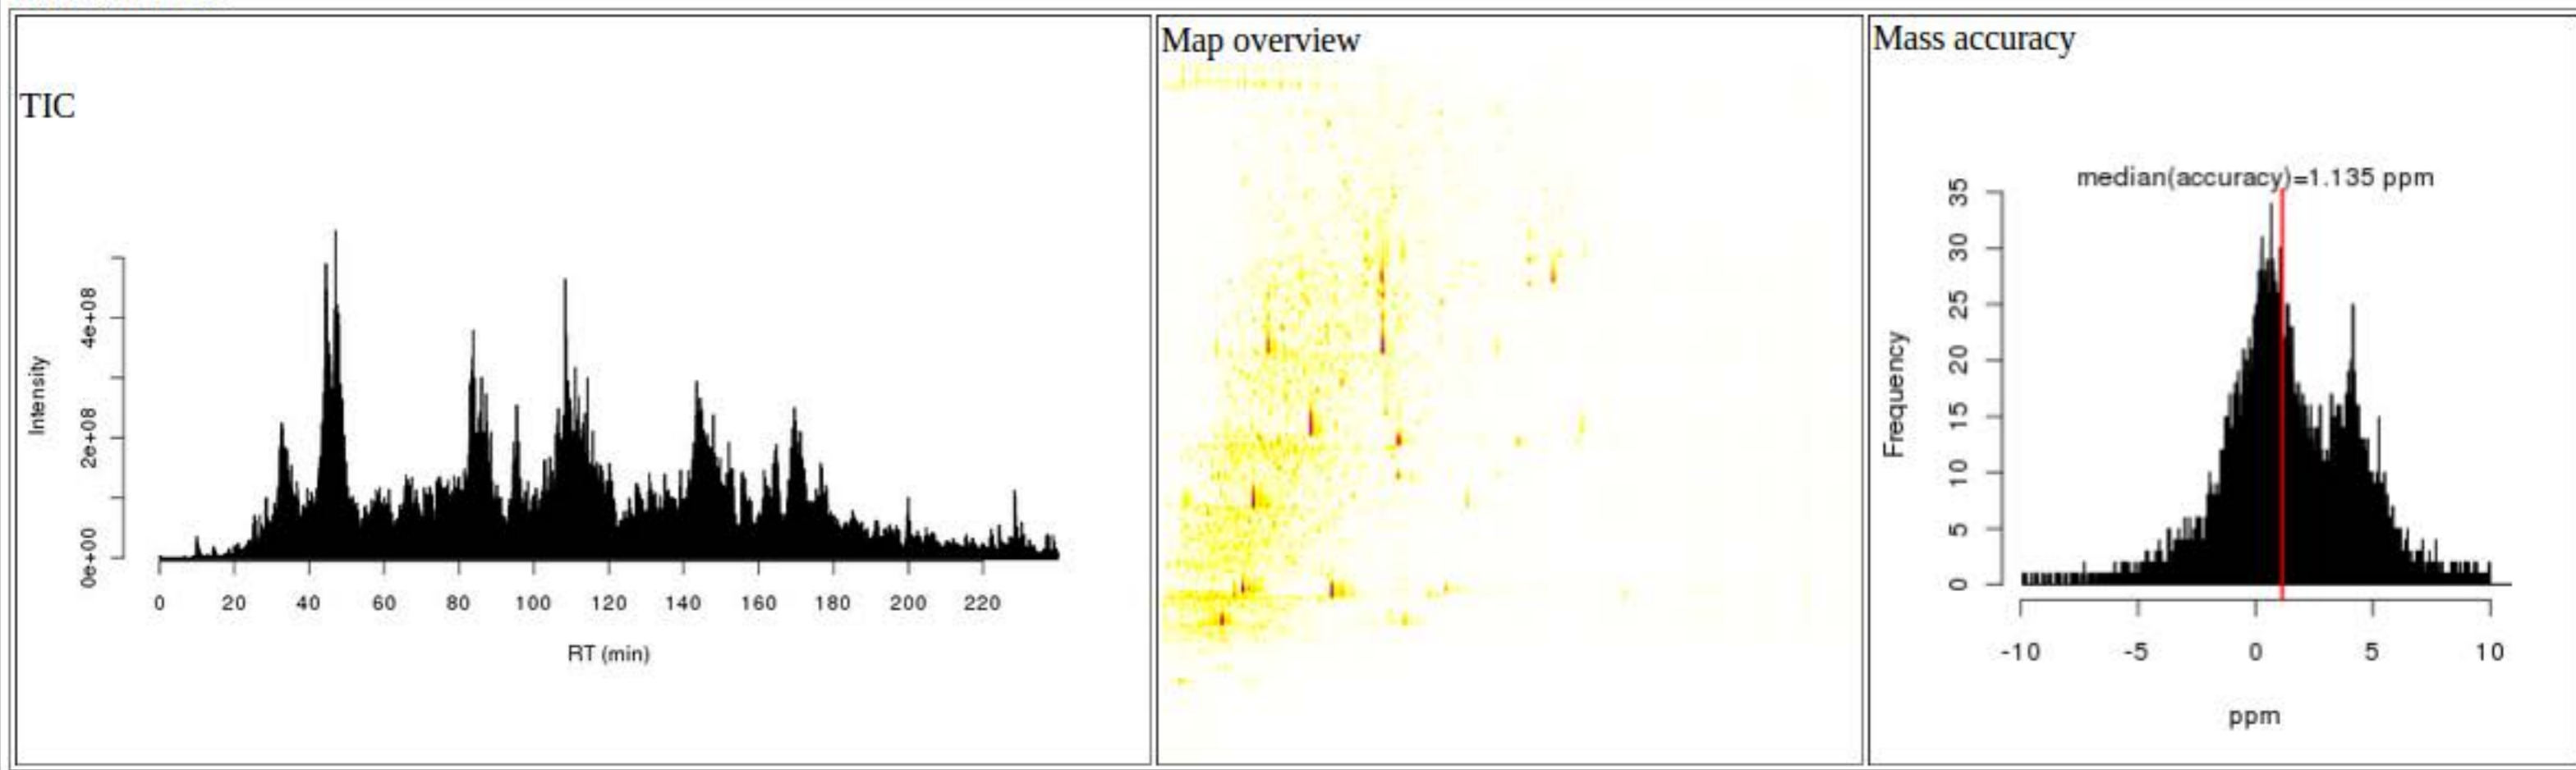

### Details

|                    |                      | Name              | Value      |
|--------------------|----------------------|-------------------|------------|
| Aquisition details |                      | MS1 spectra count | 4536       |
|                    |                      | MS2 spectra count | 30358      |
|                    |                      |                   |            |
| Aquisition ranges  |                      | Minimum           | Maximum    |
|                    | RT [s]               | 0.1764            | 14399.9268 |
|                    | MZ [amu]             | 300               | 1532       |
|                    | Name                 | Value             |            |
|                    | total number of DCMs | 10222             |            |
