# Supplementary material
Source: PubMed Central journal article supplement (PMC4125725)

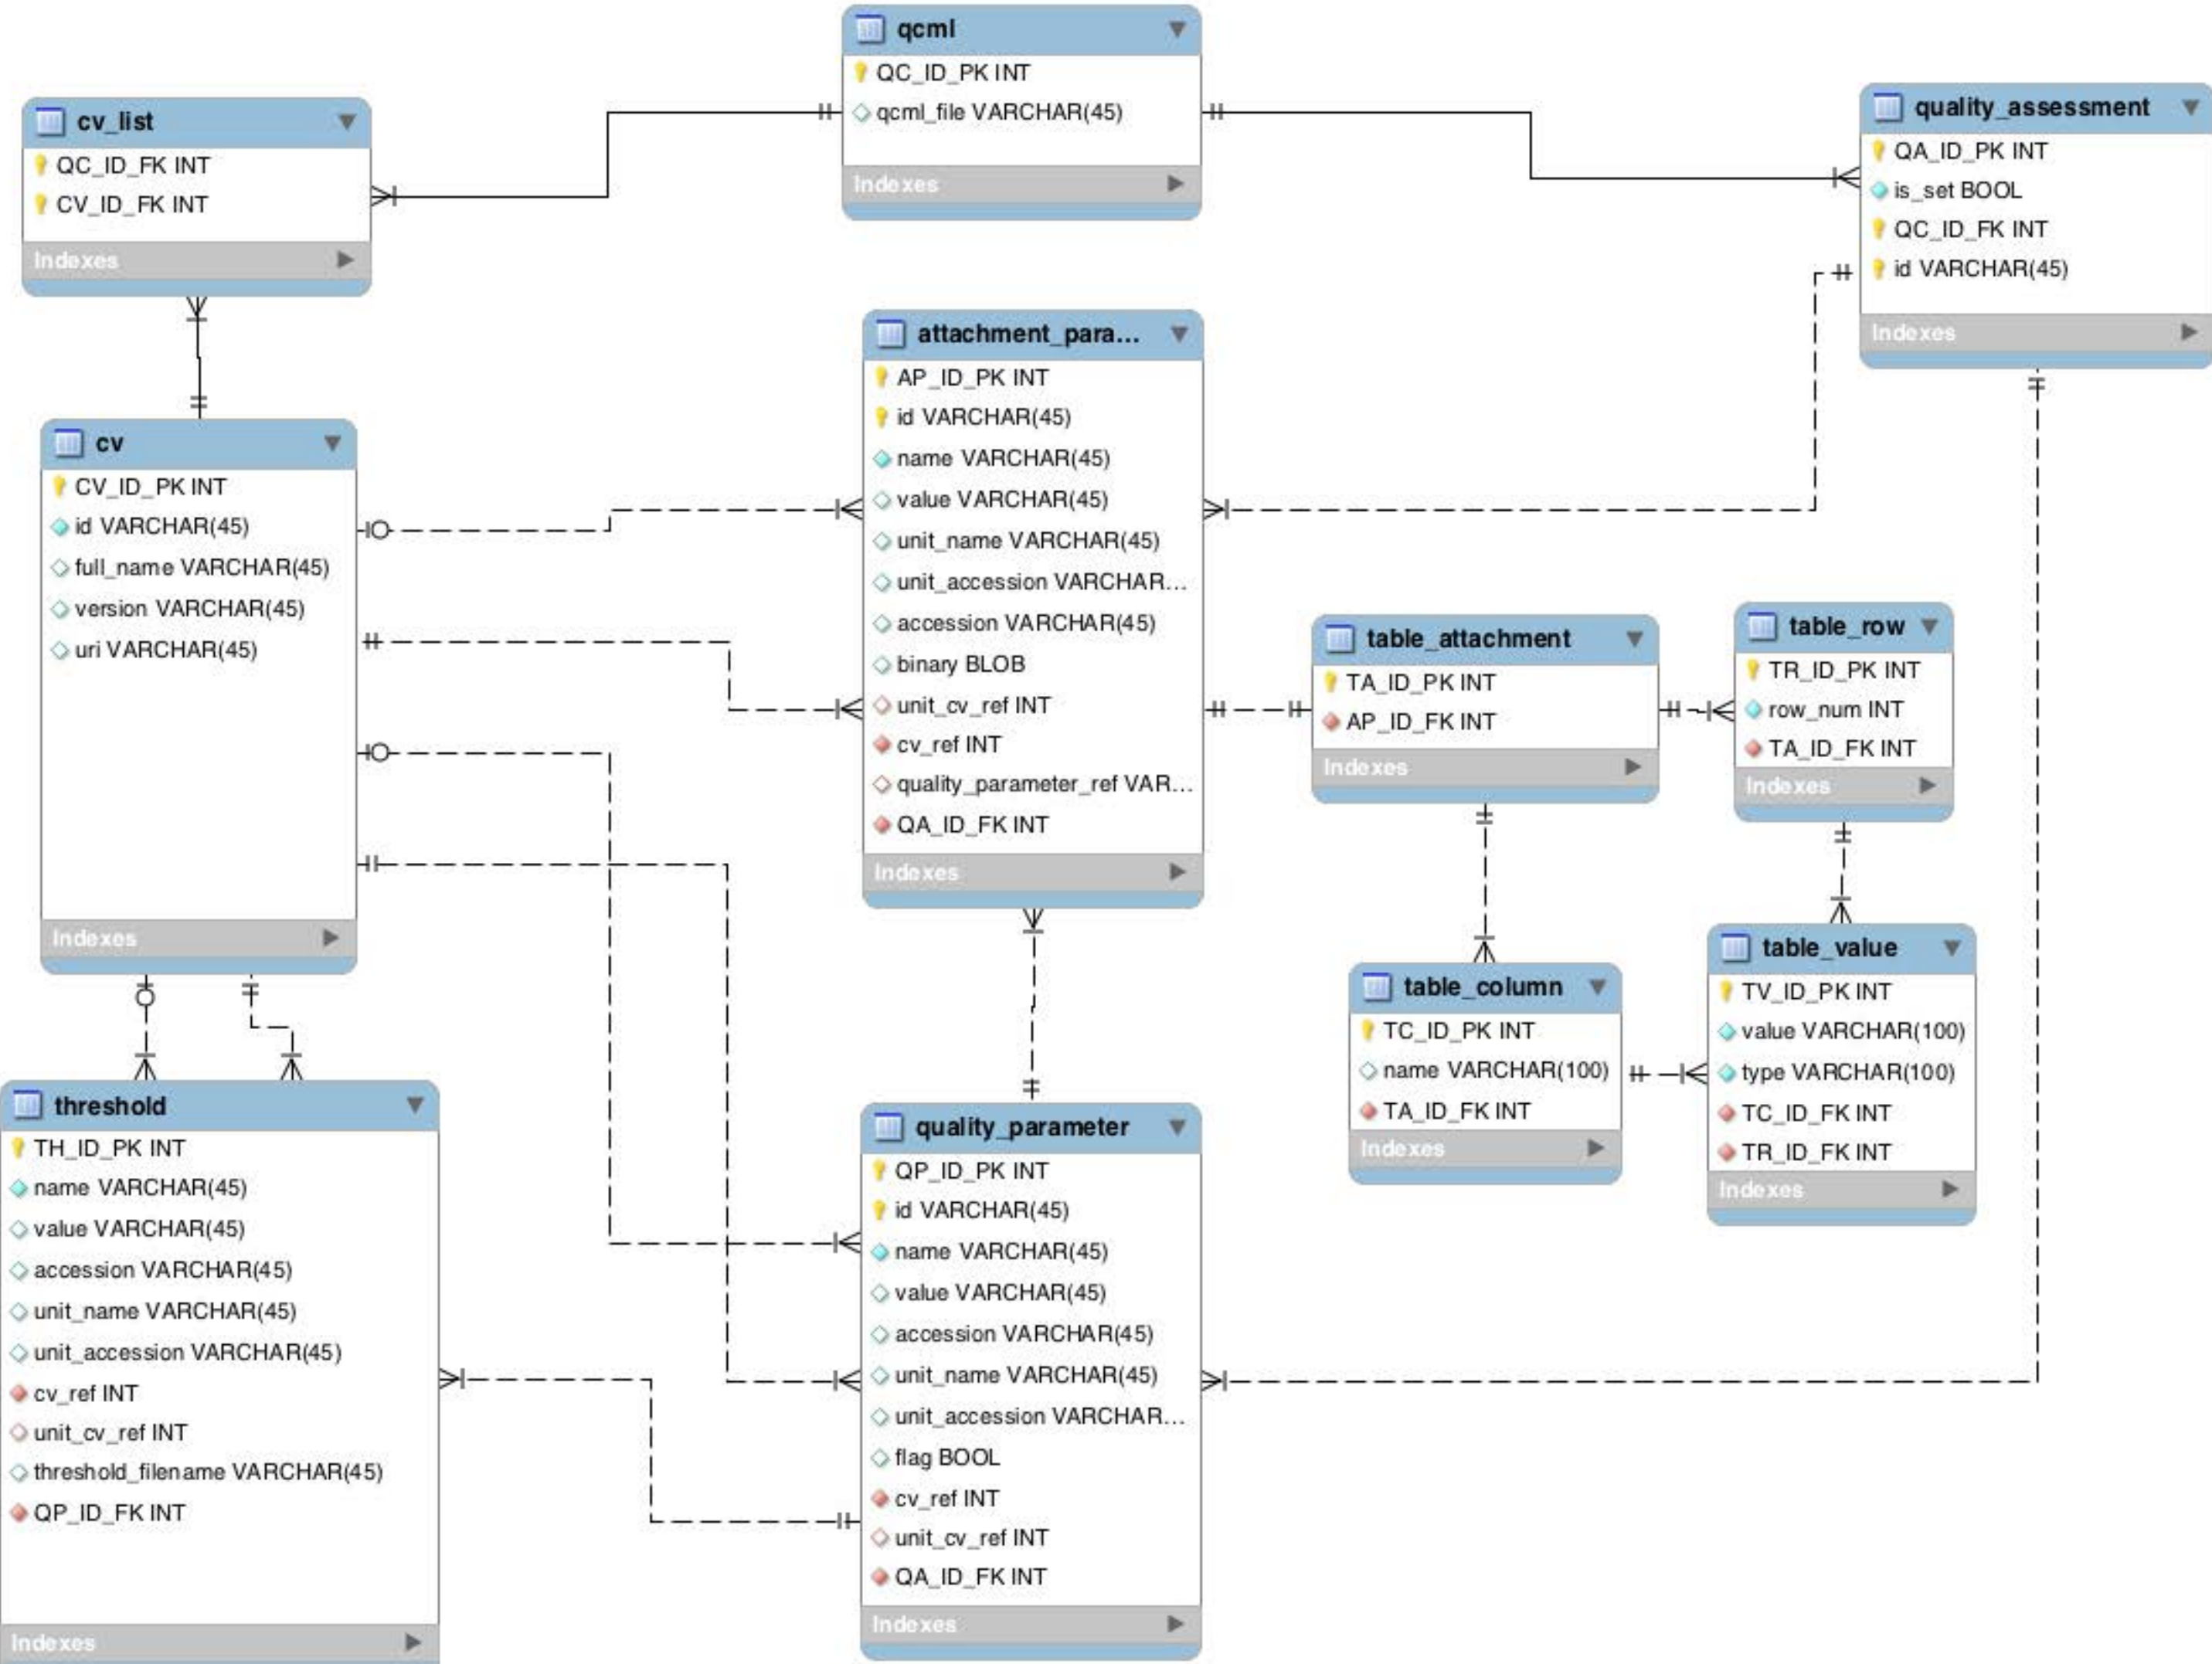

Supplement: supp_M113.035907_mcp.M113.035907-8.pdf [file supp_M113.035907_mcp.M113.035907-8.pdf]
